# Supplementary material for: Molecular determinants of plaque size as an indicator of dengue virus attenuation
Source: PubMed Central journal article supplement (PMC4868997; doi:10.1038/srep26100), 2016-05-17
Supplement: srep26100-s1.pdf [file srep26100-s1.pdf]

## **Molecular determinants of plaque size as an indicator of dengue virus attenuation**

**Kenneth Choon Meng Goh<sup>1</sup>, Choon Kit Tang<sup>1</sup>, Diana Catherine Norton<sup>2</sup>,  
Esther Shuyi Gan<sup>1</sup>, Hwee Cheng Tan<sup>1</sup>, Bo Sun<sup>2</sup>, Ayesa Syenina<sup>1</sup>, Amjad  
Yousuf<sup>3</sup>, Xin Mei Ong<sup>1</sup>, Uma Sangumathi Kamaraj<sup>1</sup>, Yin Bun Cheung<sup>1</sup>,  
Duane J Gubler<sup>1</sup>, Andrew Davidson<sup>3</sup>, Ashley Lauren St John<sup>1</sup>, October  
Michael Sessions<sup>1</sup>, Eng Eong Ooi<sup>1\*</sup>**

<sup>1</sup>Duke-NUS Medical School, Singapore 169857, Singapore

<sup>2</sup>Duke University School of Medicine, Durham, North Carolina 27710, USA

<sup>3</sup>University of Bristol, Bristol BS8 1TD, UK

**Supplementary Information**

Molecular determinants of plaque size as an indicator of dengue virus attenuation –  
Supplementary Information

**Supplementary Table 1: Dengue Genome Sequences**

| <b>Virus Strain</b> | <b>GenBank Accession Number</b> |
|---------------------|---------------------------------|
| DENV-2 16681        | KU725663                        |
| DENV-2 PDK53        | KU725664                        |
| DENV-3 16562        | KU725665                        |
| DENV-3 PGMK30FRhL3  | KU725666                        |

Molecular determinants of plaque size as an indicator of dengue virus attenuation –  
Supplementary Information

**Supplementary Table 2: PCR Primer Sequences**

| <b>Gene Target</b> | <b>Primer Sequence</b>                                                     |
|--------------------|----------------------------------------------------------------------------|
| DENV LYL 3'UTR     | Forward: TTGAGTAAACYRTGCTGCCTGTAGCTC<br>Reverse: GAGACAGCAGGATCTCTGGTCTYTC |
| GAPDH (Human)      | Forward: GAGTCAACGGATTTGGTCGT<br>Reverse: TTGATTTTGGAGGGATCTCG             |
| CXCL10 (Human)     | Forward: GGTGAGAAGAGATGTCTGAATCC<br>Reverse: GTCCATCCTTGGAAGCACTGCA        |
| ISG20 (Human)      | Forward: ACACGTCCACTGACAGGCTGTT<br>Reverse: ATCTTCCACCGAGCTGTGTCCA         |
| IFIT2 (Human)      | Forward: GAAGAGGAAGATTTCTGAAG<br>Reverse: CATTTTAGTTGCCGTAGG               |
| IFNa (Canine)      | Forward: GCTCTTGTGACCACTACACCA<br>Reverse: AAGACCTTCTGGGTCATCACG           |
| IFNb (Canine)      | Forward: GGATGGAATGAGACCACTGTCTG<br>Reverse: ACGTCCTCCAGGATTATCTCCA        |

Molecular determinants of plaque size as an indicator of dengue virus attenuation –  
Supplementary Information

**Supplementary Table 3: BHK21 siRNA Sequences (*Mesocricetus auratus*)**

| <b>Gene Target</b> | <b>siRNA Sequence</b>                                                 |
|--------------------|-----------------------------------------------------------------------|
| IRF3               | Sense: GGAACAAUGGGAGUUCGAAAdTdT<br>Antisense: UUCGAACUCCCAUUGUUCcdTdT |
| STAT1              | Sense: CCGUUUCCAUGACCUCCUUdTdT<br>Antisense: AAGGAGGUCAUGGAAACGGdTdT  |
| NF-kB p65          | Sense: GCAUCCAGACCAACAAUAAdTdT<br>Antisense: UUAUUGUUGGUCUGGAUGCdTdT  |
| NF-kB p50          | Sense: CCUCAUGUUCACCGCCUUdTdT<br>Antisense: AAAGGCGGUGAACAUGAGGdTdT   |

Molecular determinants of plaque size as an indicator of dengue virus attenuation –  
Supplementary Information  
**Supplementary Figure 1:**

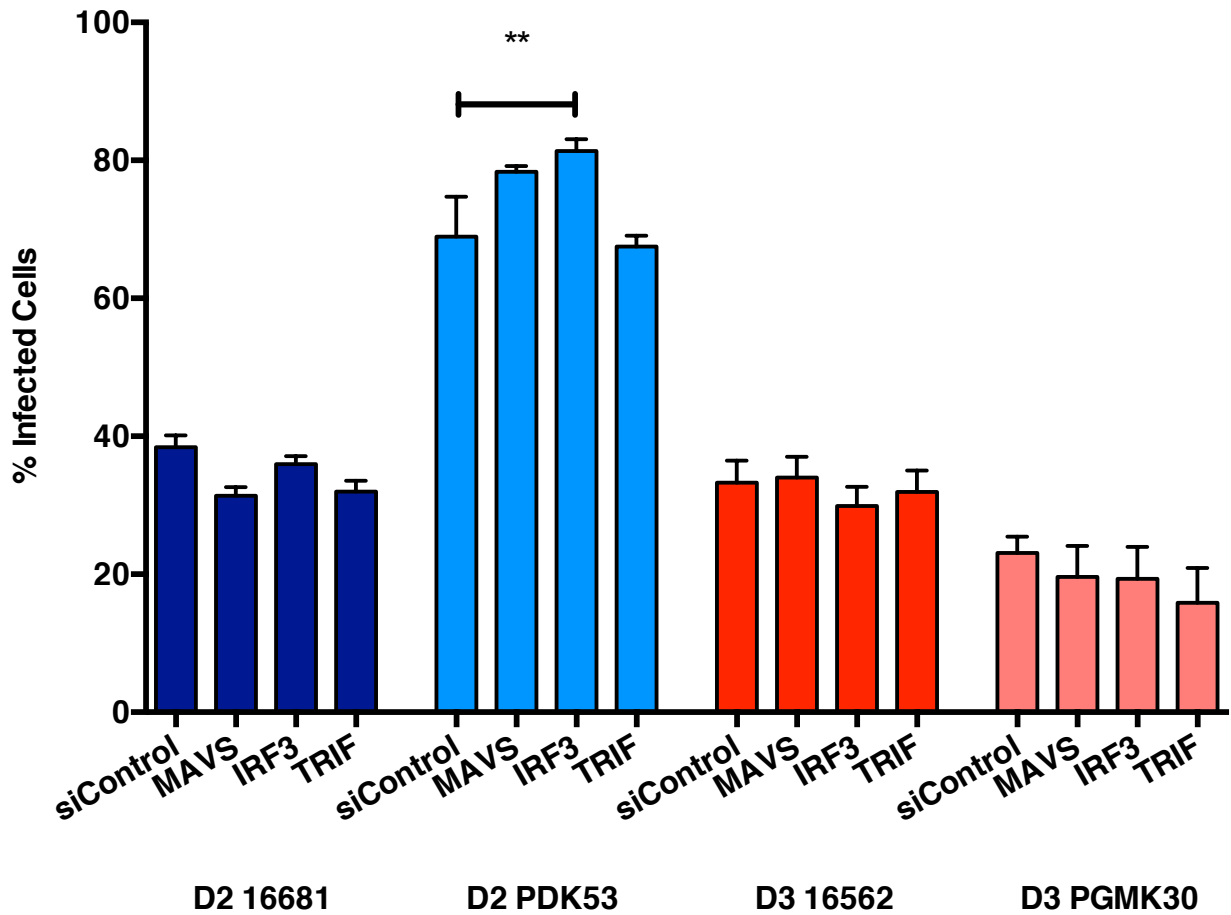

**Supplementary Figure 1:** Percentage of infected HuH-7 cells after siRNA measured by flow cytometry. There is a modest increase in the amount of cells infected by PDK53, especially with IRF3 knockdown; the other viruses are not affected.
